# Supplementary material for: Targeting cancer stem cell OXPHOS with tailored ruthenium complexes as a new anti-cancer strategy
Source: Springer Nature journal article supplement (doi:10.1186/s13046-023-02931-7), 2024-01-27
Supplement: MOESM1 [file 26667584]

**Targeting cancer stem cell OXPPOS with tailored ruthenium complexes as a  
new anti-cancer strategy**

Sonia Alcalá<sup>1,2</sup>, Lara Villarino<sup>3</sup>, Laura Ruiz-Cañas<sup>1,2</sup>, José R. Couceiro<sup>3</sup>, Miguel Martínez-Calvo<sup>3</sup>,  
Adrián Palencia-Campos<sup>1,2</sup>, Diego Navarro<sup>1,2</sup>, Pablo Cabezas-Sainz<sup>5</sup>, Iker Rodríguez-  
Arabaolaza<sup>1,4</sup>, Alfonso Cordero-Barreal<sup>1,2</sup>, Lucía Trilla-Fuertes<sup>6,7</sup>, Juan A. Rubiolo<sup>5</sup>, Sandra  
Batres-Ramos<sup>1,2</sup>, Mireia Vallespinos<sup>1,2</sup>, Cristina González-Páramos<sup>1,8,9</sup>, Jéssica Rodríguez<sup>3</sup>,  
Angelo Gámez-Pozo<sup>6,7</sup>, Juan Ángel Fresno Vara<sup>6,10</sup>, Sara Fra Fernández<sup>11</sup>, Amparo Benito  
Berlinches<sup>2,12</sup>, Nicolás Moreno Mata<sup>11</sup>, Ana María Torres Redondo<sup>13</sup>, Alfredo Carrato<sup>2,10</sup>, Patrick  
C. Hermann<sup>14</sup>, Laura Sánchez<sup>5</sup>, Susana Torrente<sup>15</sup>, Miguel Ángel Fernández-Moreno<sup>1,8,9</sup>, José L.  
Mascareñas<sup>3,\*</sup> and Bruno Sainz, Jr.<sup>1,2,10,\*</sup>

## **Supplementary Material**

**Supplementary Figures S1-S6**

**Supplementary Tables S1-S3**

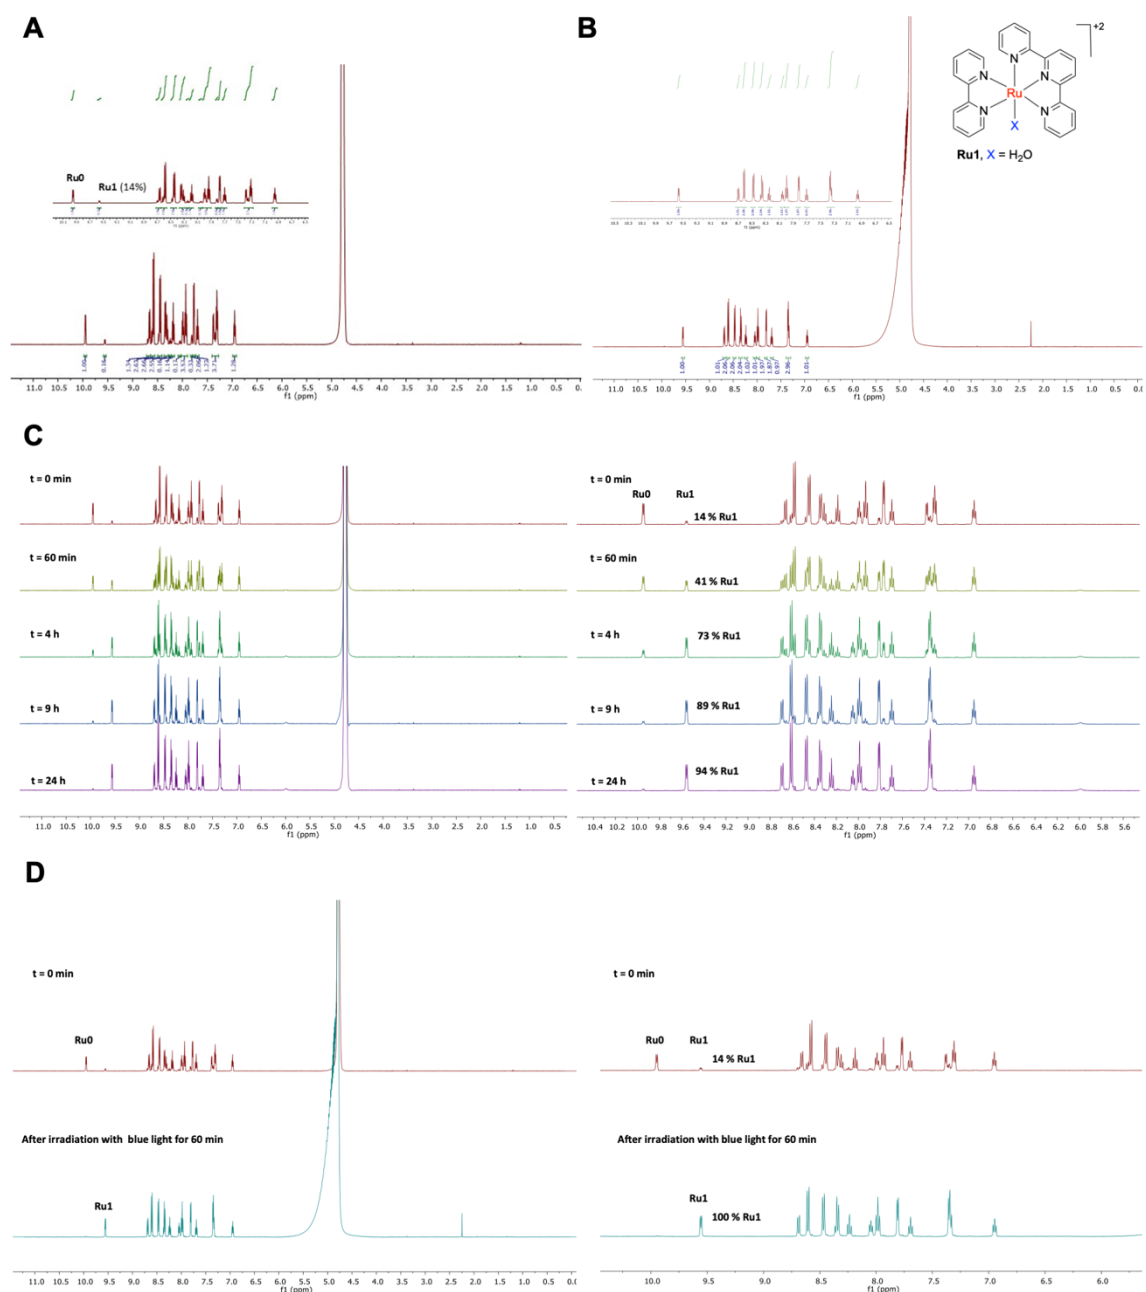

**Fig. S1** NMR studies of the aquation of  $[Ru(terpy)(bpy)Cl]Cl$  complex ( $Ru0$ ) using deuterium oxide. **A**  $^1H$ -NMR of  $[Ru(terpy)(bpy)Cl]Cl$  complex ( $Ru0$ ) in water at  $t=0$ . **B**  $^1H$ -NMR of  $[Ru(terpy)(bpy)H_2O]^{+2}Cl^{-2}$  complex ( $Ru1$ ) in water. **C**  $^1H$ -NMR of  $[Ru(terpy)(bpy)Cl]Cl$  complex ( $Ru0$ ) in water at

different times (starting concentration of  $Ru0 = 2mM$ ). **D**  $^1H$ -NMR of  $[Ru(terpy)(bpy)Cl]Cl$  complex ( $Ru0$ ) after dissolving in water ( $t=0$  min) and after irradiation with visible light for 60-120 min (starting concentration of  $Ru0 = 2mM$ ).

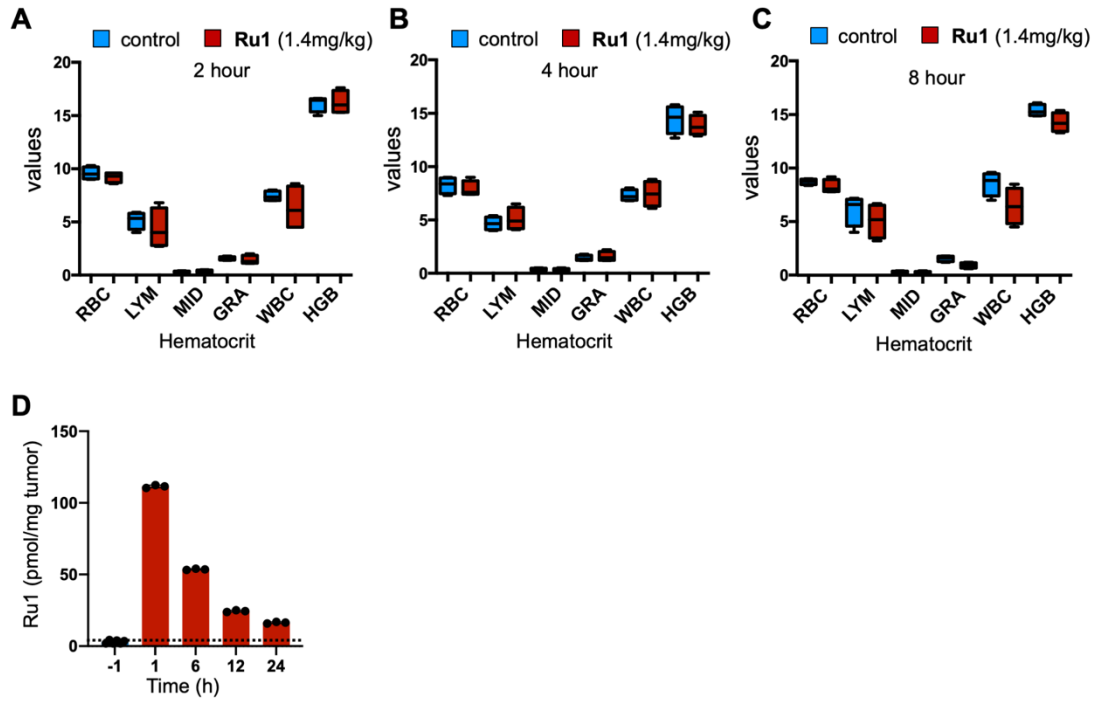

**Fig. S2** Analysis of *Ru1* toxicity in vivo. **A-C** Average values  $\pm$  SEM of indicated hematocrit parameters determined from blood of mice extracted 2h (**A**), 4h (**B**), or 8h (**C**) post treatment with diluent control (Ctl) or *Ru1* (1.4mg/kg, r.o). No significant differences were found, as

determined by unpaired two-sided Student's t-test. **D** Picomoles of *Ru1* per mg of tumor, determined by analyzing ruthenium with ICP-MS, from tumors extracted at indicated time points post treatment initiation. Dashed line indicates the background of the assay.

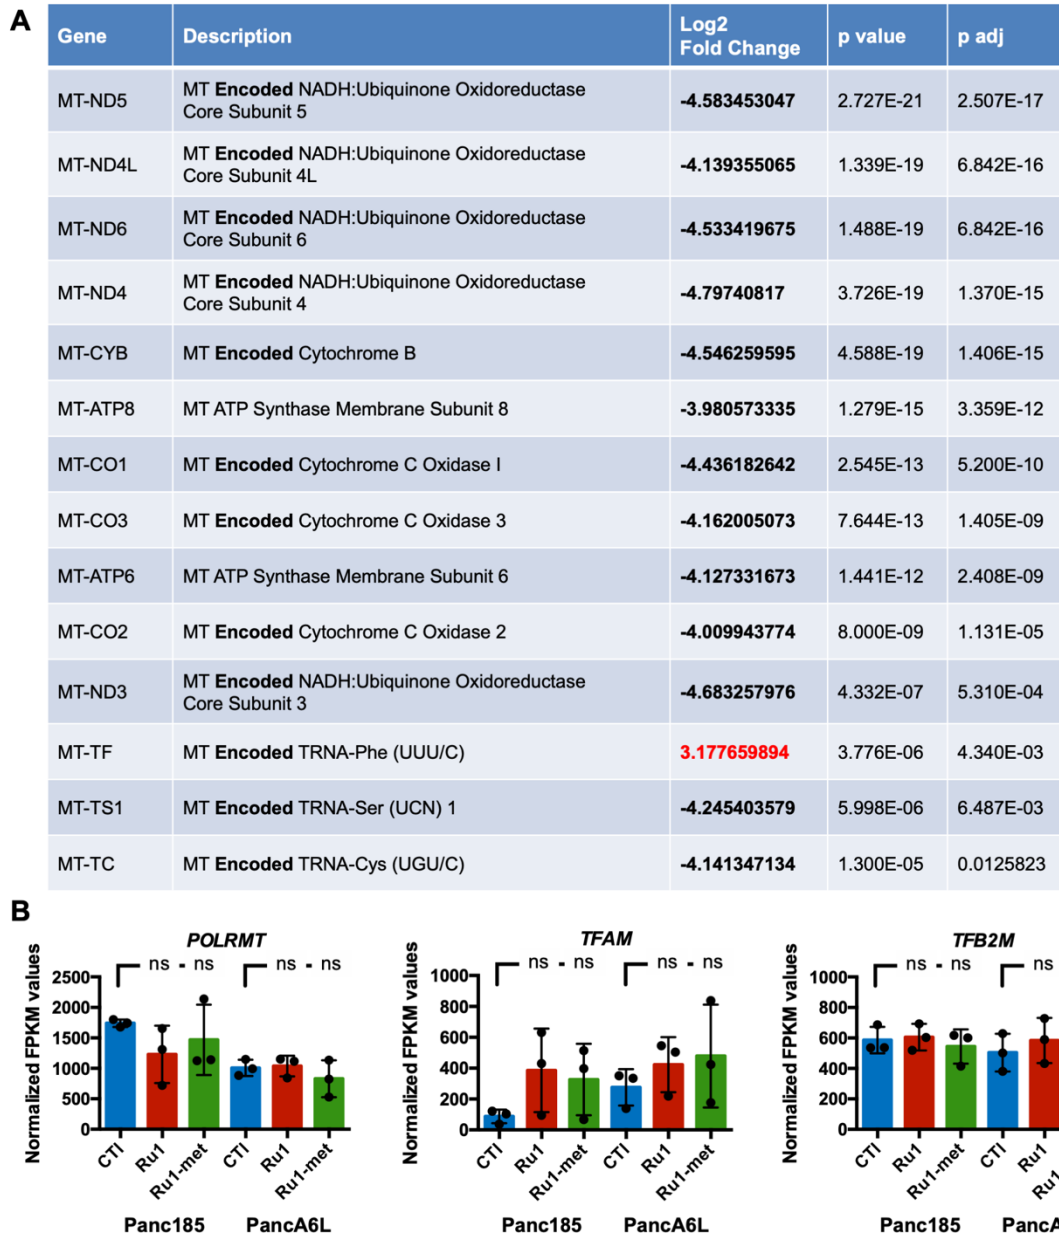

**Fig. S3** *Ru1* negatively regulates MT-encoded genes. **A** Table summarizing the 14 mtDNA-encoded genes modulated in PancA6L spheres treated with *Ru1* (100 $\mu$ M, 24 h) compared to untreated Controls. Shown are the gene name, description, Log2 fold change, *p* value and *p* adjusted (adj). **B** Mean  $\pm$  SD of normalized

Fragments Per Kilobase Million (FPKM) values for the indicated target genes in Ctl-, *Ru1* and *Ru1-met*-treated Panc185 or PancA6L spheres. (ns= not significant, as determined by one-way ANOVA with Dunnett post-test, compared to Control).

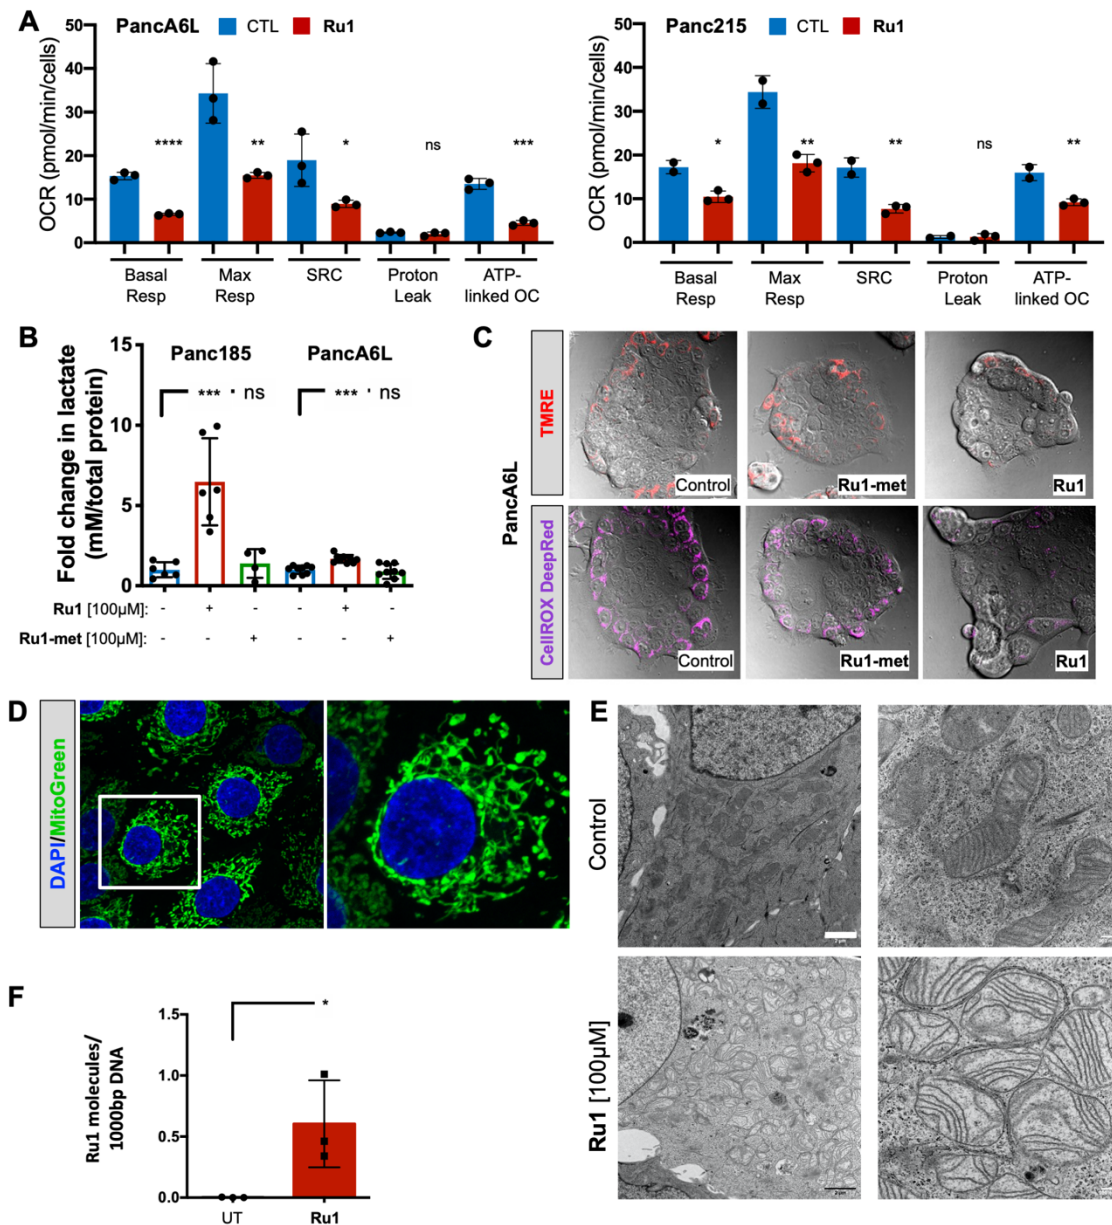

**Fig. S4** *Ru1* affects PaCSC oxygen consumption and mitochondrial properties and morphology. **A** Measured and calculated mean  $\pm$  SD oxygen consumption rate (OCR) parameters (Resp = Respiration; Max = Maximum; SRC = Spare Respiratory Capacity; OC = Oxygen consumption) in Ctl- and *Ru1*-treated PancA6L or Panc215 spheres (n = 3 biological replicates with 3 readings). \* p < 0.05, \*\* p < 0.01, \*\*\* p < 0.001, \*\*\*\* p < 0.0001, ns = not significant, as determined by unpaired two-sided Student's t-test. **B** Mean fold-change  $\pm$  SD in lactate (mM/total protein) in untreated (-), *Ru1* (100μM) or *Ru1-met* (100μM)-treated Panc185 and PancA6L cells compared to control, set as 1.0. \*\*\* p < 0.001, ns = not significant, as determined by one-way ANOVA with Dunnett post-test, compared to Control. **C**

Representative IF confocal images of TMRE (mitochondria membrane potential) or CellROX DeepRed (ROS) staining in untreated (Control), *Ru1* (100μM) or *Ru1-met* (100μM)-treated PancA6L cells (24 h). **D** Representative fluorescence confocal images of MitoGreen (mitochondrial mass) and DAPI (Blue) staining in *Ru1* (100μM)-treated PancA6L cells (24 h). Scale bar = 10 μM. **E** Representative transmission electron micrographs of Control (untreated) or *Ru1* (100μM)-treated Panc185 cells (24 h). Mitochondria are better defined in the Control compared to *Ru1*-treated samples. **F** Amount of *Ru1* molecules per 1000bp of DNA, determined by ICP, in mtDNA isolated from gradient-purified mitochondria from untreated (CTL) or *Ru1*-treated (100μM, 2 h) Panc185 cells.



**A**

Position 16,162, SCORE: -1.085  
 AAAACCCAATCCACATCAAAACCCCCTCCCCATGCTTACAAGCAAAGT  
 Position 16,242, SCORE: -0.969  
 TGCAACTCCAAAAGCCACCCCTCACCCACTAGG  
 Position 16,254; SCORE: -1.154  
 GCCACCCCTCACCCACTAGGATACCA  
 Position 16,352; SCORE: -1.286  
 CCCTTCTCGTCCCATGGATGACCCCTCAGATA  
 Position 283, SCORE: -1.224  
 ACAAAAATTTCCACAAAACCCCTCCCCCGCTTCTGGCCACAGCAC  
 Position 431, SCORE: -1.533  
 ACCCCCCAATAACACATTATTTCCCTC  
 Position 442; SCORE: -1.0  
 AACACATTATTTCCCTCCCACTCCACTACTAATCT  
 Position 477, SCORE: -1.091  
 AATCTCATCAATACAACCCCGGCCATCCTACCCAGCACACACA  
 Position 517, SCORE: -1.288  
 CACACACCGCTGTAAACCCATACCCGAAACCAACCAACCCCAAAAGA  
 CACCCCAACAGTTTATG

**B**

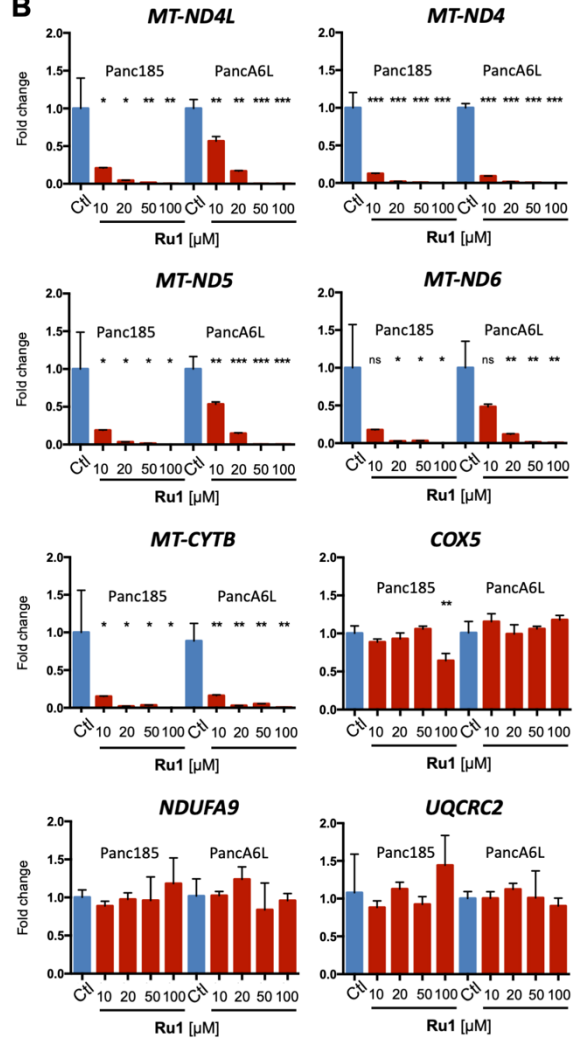

**Fig. S6 Ru1 inhibits mtDNA transcription.** **A** Sequence of 9 predicted GQs in the D-loop region, their positions and G4Hunter score indicating G4-prone structures. Isolated guanines (G) are shown in red, and cysteines (C) in blue. **B** Mean fold-change ± SD in the relative mRNA expression of the indicated mtDNA- and

nuclear-encoded genes as a function of increasing concentrations of Ru1 in Panc185 or PanA6L cells (48h treatment). Values were normalized to β-actin levels. \* p < 0.05, \*\* p < 0.01, \*\*\* p < 0.001, as determined by one-way ANOVA with Dunnett post-test, compared to untreated (Ctl).

## SUPPLEMENTARY TABLES

Table S1 Antibodies

| 1 <sup>st</sup> Abs-Epitope             | Source           | Dilution | Application | Manufacturer (Catalog no.)            |
|-----------------------------------------|------------------|----------|-------------|---------------------------------------|
| $\alpha$ -hu/mu-GAPDH                   | Mouse monoclonal | 1:5000   | WB          | Abcam (Cat no. ab8245)                |
| Total OXPHOS Human WB Antibody Cocktail | Mouse monoclonal | 1:500    | WB          | Abcam (Cat no. ab110411)              |
| $\alpha$ -hu-CD133/1-APC                | Mouse monoclonal | 1:50     | FC          | Miltenyi Biotec (Cat no. 130-090-826) |
| $\alpha$ -hu-EpCAM-FITC                 | Mouse monoclonal | 1:50     | FC          | Miltenyi (Cat no. 130-110-998)        |
| $\alpha$ -hu-CXCR4-PE                   | Mouse monoclonal | 1:50     | FC          | Miltenyi (Cat no. 130-117-354)        |
| $\alpha$ -hu-CD90-APC                   | Mouse monoclonal | 1:20     | FC          | Molecular Probes (Cat no. A15726)     |

| 2 <sup>nd</sup> Abs-Epitope | Source | Dilution | Application | Manufacturer (Catalog no.) |
|-----------------------------|--------|----------|-------------|----------------------------|
| Anti-mouse-HRP              | Sheep  | 1:5000   | WB          | Amersham (NA931)           |
| Anti-rabbit-HRP             | Donkey | 1:5000   | WB          | Amersham (NA934)           |

Table S2 RTqPCR primer sequences

| Gene           | Species | Primer sense              | Primer antisense        |
|----------------|---------|---------------------------|-------------------------|
| $\beta$ -ACTIN | human   | GCGAGCACACGAGCCTCGCCTT    | CATCATCCATGGTGAGCTGGCGG |
| POU5F1         | human   | CTTGCTGCAGAAGTGGGTGGAGGAA | CTGCAGTGTGGGTTTCGGGCA   |
| SOX2           | human   | AGAACCCCAAGATGCACAAC      | CGGGGCCGGTATTTATAATC    |
| PGC1A          | human   | TGACTGGCGTCATTCAGGAG      | CCAGAGCAGCACACTCGAT     |
| MT-ND1         | human   | GCACTGCGAGCAGTAGCCCA      | TGGCCAAGGGTCATGATGGCA   |
| MT-ND2         | human   | AACTCCAGCACCAGACCCT       | AAAAGCCGGTTAGCGGGGGC    |
| MT-CO1         | human   | CTCTTCGTCTGATCCGTCCT      | ATTCCGAAGCCTGGTAGGAT    |
| MT-CO2         | human   | CGCCCTCCCATCCCTACGCA      | CCGCCGTAGTCGGTGTACTCG   |
| MT-ATP8        | human   | CCACCTACCTCCCTACCAAAGC    | TGGGGGCAATGAATGAAGCGAAC |
| MT-ATP6        | human   | TCCCCTTATGAGCGGGCACAG     | TAGGCGTACGGCCAGGGCTA    |
| MT-CO3         | human   | GCCCTCCTAATGACCTCCGGC     | TGGACAGGTGGTGTGTGGTGG   |
| MT-ND3         | human   | TCGACCCTATATCCCCCGCC      | TGGTAGGGGTAAAAGGAGGGCA  |
| MT-ND4L        | human   | TCGCTCACACCTCATATCCTCCCTA | AGAGGGAGTGGGTGTTGAGGGTT |
| MT-ND4         | human   | TCGCCACGGGCTTACATCC       | AGGCGAGGTTAGCGAGGCTT    |
| MT-ND5         | human   | TCCGCTTCCACCCCTAGCA       | GGCGCAGACTGCTGCGAACA    |
| MT-ND6         | human   | GATTGTTAGCGGTGTGGTCCGGT   | GACCTCAACCCCTGACCCCA    |
| MT-CYTB        | human   | ACCAGACGCCTCAACCGCC       | GCCTCGCCCGATGTGTAGGAA   |
| COX5           | human   | CTTTGCGGGCATGCAGACGG      | AGCCCATCCATGCGGTTTACT   |
| NDUFA9         | human   | AGTGGAGCGGATGCACATCACA    | GACGGTCTTGCCGGCTTCA     |
| UQCRC2         | human   | GGCCACAGCTGCTGGAGATGTTA   | GCAACTAGAGCCTGGGACCCG   |
| Hprt           | mouse   | TCCTCCTCAGACCGCTTTT       | CCTGGTTCATCATCGCTAATC   |
| Atp6           | mouse   | TCCAATCGTTGTAGCCATCA      | AGACGGTTGTTGATTAGGCGT   |
| Cox1           | mouse   | ATCACTACCAGTGCTAGCCG      | CCTCCAGCGGGATCAAAGAA    |
| Drp1           | mouse   | ATGCCAGCAAGTCCACAGAA      | TGTTCTCGGGCAGACAGTTT    |

Table S3 PCR primer sequences

| Gene    | Species | Primer sense           | Primer antisense           |
|---------|---------|------------------------|----------------------------|
| D-loop  | human   | CTCACCCATCAACAACCGCT   | TATGGGGTGATGTGAGCCCG       |
| MT-RNR2 | human   | TTCAAGCTCAACACCCACTACC | GGAGCCATTTCATACAGGTCCCTATT |
